# Supplementary material for: Machine-Learning-Based Prediction and Interpretation of Non-Erosive Reflux Disease Risk
Source: Research Square preprint supplement (doi:10.21203/rs.3.rs-7309579/v1), 2025-09-22
Supplement: Supplementary file 1 [file 50aa90d0a1da1a46e170cc57.xlsx]

## Sheet: Sheet1
group	sex	age	身高	体重	BMI	waistline	smoking	drinking	drinktea	SweetfoodPref	GreasyFoodPref	RLD	CCB	Constipation	HT	TMD	UA	HLD	RE	S	IPCL	EGME	NECG	Cardiapolyp	GEFV	HH
1	0	61	178	80	25.2493	90	0	0	1	0	0	0	0	0	0	0	0	0	0	0	0	0	0	0	0	0
1	1	40	160	54	21.0938	84	0	1	0	0	0	0	0	0	1	0	0	0	0	0	0	0	1	0	0	0
1	1	37	160	60	23.4375	93	0	1	0	0	0	0	0	0	0	0	0	0	0	0	0	0	0	0	0	0
1	1	70	150	57	25.3333	71	0	1	0	0	0	0	1	1	1	1	0	0	0	0	0	0	0	0	1	0
1	1	58	154	60	25.2994	55	0	0	0	0	0	0	0	0	0	0	0	0	0	0	1	0	0	0	0	0
1	1	43	150	64	28.4444	94	0	1	0	0	0	1	0	1	0	0	0	0	0	0	0	0	0	0	0	0
1	0	60	173	73	24.3911	83	0	0	0	0	0	0	0	0	0	0	0	0	0	0	1	0	0	0	0	0
1	1	57	156	59	24.2439	70	0	1	1	0	0	0	0	0	0	0	0	0	0	0	1	0	0	0	0	0
1	1	41	162	55	20.9572	98	1	1	1	0	0	0	0	0	0	0	0	0	0	0	0	0	0	0	0	0
1	0	61	170	80	27.6817	89	1	1	0	0	0	1	1	0	1	0	0	0	0	0	1	0	0	0	0	0
1	1	77	167	60	21.5139	72	0	1	1	0	0	0	0	0	0	0	0	0	0	0	1	0	0	0	0	0
1	1	53	160	55	21.4844	73	0	1	0	0	0	0	0	0	0	0	0	0	0	0	0	0	0	0	0	0
1	1	52	150	60	26.6667	85	0	1	0	0	0	1	0	0	0	0	0	0	0	0	0	0	0	0	0	0
1	1	60	157	55	22.3133	96.6	0	1	0	0	0	0	0	1	0	0	0	1	0	0	0	0	1	0	0	0
1	0	57	173	70	23.3887	75	0	0	0	0	0	0	0	0	0	0	0	1	0	0	1	0	0	0	1	0
1	0	68	180	72	22.2222	92	0	1	1	0	0	0	0	0	0	0	1	1	0	0	0	0	0	0	0	0
1	1	50	160	63	24.6094	90	0	1	0	0	0	0	1	0	1	1	1	1	0	0	1	0	1	0	0	0
1	0	55	176	89	28.7319	90	0	1	0	0	0	0	0	0	0	0	0	0	0	0	1	0	0	0	0	0
1	0	47	160	73	28.5156	79	0	1	0	0	0	0	0	0	0	0	0	1	0	0	0	0	0	0	0	0
1	1	48	162	63	24.0055	80	0	0	0	0	0	0	0	0	1	0	0	0	0	0	0	1	0	0	0	0
1	0	53	172	56	18.9292	70	1	0	1	0	0	0	1	1	1	1	0	0	0	0	1	0	1	0	0	0
1	1	67	158	69	27.6398	90	0	1	0	0	0	0	0	0	0	0	0	1	0	0	0	0	0	0	0	0
1	0	34	170	75	25.9516	87	1	0	1	0	0	0	1	0	1	0	0	1	0	0	0	0	0	0	0	0
1	1	62	160	48	18.75	99.9	0	1	0	0	1	0	0	0	0	0	0	1	0	0	0	0	0	0	1	0
1	0	28	173	70	23.3887	76.5	0	1	0	0	1	0	0	0	0	0	0	0	0	0	1	0	0	0	0	0
1	0	59	165	70	25.7117	83.3	1	1	1	0	1	1	0	0	1	0	0	1	0	0	0	0	0	0	0	0
1	1	53	165	75	27.5482	93.2	0	1	0	0	1	0	1	0	1	0	0	1	0	0	1	0	0	1	0	0
1	1	73	159	56	22.151	86.6	0	0	0	0	0	0	0	0	0	0	0	1	0	0	0	0	0	0	0	0
1	1	60	169	71	24.8591	85	0	1	0	0	1	0	0	0	0	0	0	1	0	0	1	0	0	0	0	0
1	1	41	158	70	28.0404	72	0	0	0	0	0	1	0	0	0	0	0	0	0	0	1	0	0	0	0	0
1	1	45	160	60	23.4375	96.5	0	0	0	0	0	1	0	0	0	0	0	0	0	0	1	0	0	0	0	0
1	1	69	168	60	21.2585	90	0	1	0	0	1	0	1	0	1	0	0	1	0	0	0	0	0	0	0	0
1	1	68	158	72	28.8415	93	0	1	0	0	1	0	0	0	0	0	0	0	0	0	1	0	0	0	0	0
1	1	60	165	60	22.0386	71	0	1	0	0	1	1	0	0	0	0	0	0	0	0	0	0	1	0	0	0
1	0	34	170	78	26.9896	73.3	0	0	1	0	0	0	0	0	0	0	0	1	0	0	0	0	0	0	0	0
1	0	58	168	73	25.8645	66.6	0	1	1	0	1	0	0	0	0	0	0	0	0	0	0	0	0	0	0	0
1	0	72	171	76	25.9909	98.3	1	1	1	0	1	0	0	0	0	0	0	0	0	0	0	1	0	0	0	0
1	1	59	156	70	28.764	85	0	0	0	0	0	1	1	0	1	0	0	1	0	0	0	0	0	0	0	0
1	0	62	175	65	21.2245	80	0	1	0	0	0	0	0	0	0	0	0	0	0	0	0	0	0	0	0	0
1	0	68	160	60	23.4375	72	0	1	0	0	0	0	0	0	0	0	0	0	0	0	0	0	0	1	0	0
1	1	61	158	70	28.0404	90	0	0	0	0	0	0	0	0	1	0	0	0	0	0	1	0	0	0	0	0
1	1	71	160	70	27.3438	84	0	1	0	0	1	0	1	0	1	1	0	1	0	0	1	0	0	0	1	0
1	1	68	156	67	27.5312	93	0	0	0	0	0	0	0	0	0	0	0	1	0	0	0	1	0	0	0	0
1	0	38	175	80	26.1224	71	0	1	0	0	1	0	0	0	0	0	0	1	0	0	0	0	0	0	0	0
1	1	49	166	69	25.0399	55	0	1	0	0	1	0	0	0	1	0	0	1	0	0	0	0	0	0	0	0
1	0	75	170	70	24.2215	94	0	0	0	0	0	1	0	0	0	0	0	1	0	0	1	0	0	0	0	0
1	0	58	175	75	24.4898	83	1	1	0	0	1	0	0	1	1	0	0	0	0	0	1	0	0	0	1	0
1	1	53	164	75	27.8852	70	0	1	0	0	0	0	0	0	1	1	0	1	0	0	0	0	0	0	0	0
1	0	67	175	80	26.1224	98	0	0	0	0	0	0	0	0	0	0	0	0	0	0	0	0	0	0	0	0
1	1	53	160	54	21.0938	77	0	0	0	0	0	0	0	0	0	0	0	1	0	0	1	0	0	0	0	0
1	1	63	163	65	24.4646	72	0	1	0	0	0	1	0	0	0	0	0	1	0	0	1	0	0	0	0	0
1	1	61	163	62	23.3355	73	0	1	1	0	1	0	0	0	1	0	0	0	0	0	0	0	0	1	0	0
1	1	42	156	68	27.9421	97	0	1	0	0	1	0	0	0	1	1	0	1	0	0	0	0	0	0	1	0
1	1	35	164	70	26.0262	96.6	0	1	0	0	1	0	0	0	0	0	0	1	0	0	0	0	0	0	0	0
1	1	71	167	75	26.8923	75	0	1	0	0	1	0	0	0	0	1	0	1	0	0	1	0	0	0	0	0
1	1	45	160	60	23.4375	92	0	0	0	0	0	1	0	0	0	0	0	0	0	0	0	0	0	0	0	0
1	0	29	180	96	29.6296	90	0	0	1	0	1	0	0	0	0	0	0	0	0	0	0	0	0	0	0	0
1	1	62	168	60	21.2585	69	0	1	0	0	0	0	0	0	0	0	0	0	0	0	1	0	0	0	0	0
1	1	62	165	74	27.1809	71	0	0	0	0	0	0	1	1	1	0	0	0	0	0	0	0	0	0	0	0
1	1	56	169	78	27.31	73	0	1	1	0	0	0	1	0	1	0	0	0	0	0	1	0	0	0	0	0
1	1	34	158	52	20.83	67	0	1	0	0	1	0	0	0	0	0	0	0	0	0	0	0	0	0	0	0
1	1	62	163	65	24.4646	93.2	0	1	0	0	1	1	0	0	0	0	0	0	0	0	1	0	0	0	0	0
1	1	70	168	70	24.8016	69.9	0	1	0	0	1	0	0	0	0	0	0	0	0	0	0	0	0	0	0	0
1	0	64	170	80	27.6817	89	0	1	0	0	0	0	0	0	0	0	0	1	0	0	1	0	1	0	0	0
1	1	67	170	65	22.4913	83	1	1	1	0	1	0	0	0	0	0	0	0	0	0	1	0	1	0	0	0
1	0	70	173	78	26.0617	100	0	0	0	0	0	0	0	0	0	0	0	1	0	0	1	0	0	0	0	0
1	1	59	160	80	31.25	80	0	1	0	0	1	0	0	0	0	0	0	0	0	0	1	0	1	0	0	0
1	1	71	170	65	22.4913	74	0	1	0	0	0	0	0	0	1	1	0	1	0	0	0	0	0	1	0	0
1	0	73	170	72	24.9135	77	0	1	0	0	1	0	1	1	1	0	1	0	0	0	0	0	0	0	0	0
1	0	56	166	70	25.4028	90	0	0	1	0	1	0	0	0	0	0	0	1	0	0	0	0	0	0	0	0
1	1	68	168	63	22.3214	87	0	1	0	0	1	1	0	0	0	0	0	0	0	0	0	0	0	0	0	0
1	1	62	163	60	22.5827	83	0	0	0	0	1	0	0	0	0	0	0	0	0	0	0	1	0	0	0	0
1	0	59	160	63	24.6094	80	0	0	0	0	0	0	0	0	1	0	0	0	0	0	0	0	0	0	0	0
1	1	67	159	60	23.7332	100	0	0	0	0	0	0	0	0	1	0	0	0	0	0	0	0	0	0	0	0
1	0	62	173	87	29.0688	98	0	0	0	0	0	1	1	0	1	0	0	0	0	0	0	0	0	0	0	0
1	0	44	160	47	18.3594	67	1	0	0	0	1	1	0	0	0	0	0	0	0	0	1	0	0	0	0	0
1	0	73	178	80	25.2493	73	0	0	0	0	0	0	0	0	0	0	0	1	0	0	0	0	1	0	0	0
1	1	51	165	58	21.3039	85	0	0	0	0	1	0	0	0	1	0	0	1	0	0	0	1	0	0	0	0
1	1	61	156	70	28.764	98	0	0	0	0	1	0	0	0	1	0	1	1	0	0	1	0	0	0	0	0
1	0	56	170	89	30.7958	90	0	0	0	0	0	1	1	1	1	0	0	0	0	0	1	0	0	0	0	0
1	1	66	163	70	26.3465	75	0	0	1	0	1	0	1	0	1	1	0	1	0	0	0	0	0	0	0	0
1	1	51	156	67	27.5312	79	0	0	0	0	0	0	0	0	0	0	0	0	0	0	1	0	0	0	0	0
1	0	53	173	70	23.3887	92	0	0	0	0	0	0	0	0	0	0	0	1	0	0	0	1	0	0	0	0
1	0	53	177	75	23.9395	89	1	0	0	0	1	0	0	0	0	1	0	0	0	0	0	0	0	0	0	0
1	0	39	175	80	26.1224	78	0	0	0	0	1	0	0	1	1	0	0	0	0	0	0	0	0	1	1	0
1	0	66	180	85	26.2346	73.3	0	0	0	0	1	0	0	0	1	0	0	1	0	0	0	0	0	0	0	0
1	0	61	176	82	26.4721	90	0	0	0	0	1	0	0	0	0	0	0	0	0	0	1	1	0	0	0	0
1	0	49	172	75	25.3515	88	0	0	0	0	1	1	1	0	1	1	0	0	0	0	1	0	0	0	0	0
1	0	35	176	83	26.7949	90	1	1	1	0	1	0	0	1	1	0	0	1	0	0	0	0	0	0	1	0
1	1	68	160	60	23.4375	84	0	0	0	0	0	0	0	0	0	0	0	0	0	0	0	0	0	0	0	0
1	0	59	165	70	25.7117	76	1	0	0	0	1	0	1	0	1	0	0	1	0	0	0	0	0	0	0	0
1	1	50	163	66	24.841	75	0	0	0	0	1	1	0	0	0	0	0	0	0	0	1	0	0	0	0	0
1	1	31	160	58	22.6562	99.9	0	0	0	0	0	1	0	0	0	0	0	0	0	0	0	0	0	0	0	0
1	0	66	178	80	25.2493	76.5	0	0	0	0	0	0	1	0	1	0	0	0	0	0	1	0	1	0	0	0
1	1	59	156	67	27.5312	93.2	0	0	0	0	0	1	0	0	0	0	0	0	0	0	1	1	0	0	0	0
1	1	39	155	50	20.8117	83.3	0	0	0	0	1	1	1	0	1	0	0	1	0	0	0	0	0	0	0	0
1	0	38	170	55	19.0311	75	1	1	1	0	1	0	0	0	0	0	0	0	0	0	1	0	0	0	1	0
1	0	39	170	60	20.7612	90	1	1	1	0	1	1	0	0	0	0	1	0	0	0	1	0	0	0	0	0
1	0	53	170	70	24.2215	93	0	1	1	0	0	1	0	0	0	0	0	0	0	0	1	0	0	0	0	0
1	1	51	165	75	27.5482	92	1	0	0	0	0	0	0	0	0	0	0	0	0	0	1	0	0	0	0	0
1	0	44	172	65	21.9713	83	0	1	1	0	1	1	0	1	0	0	0	0	0	0	1	0	0	0	0	0
1	1	46	160	60	23.4375	80	0	1	1	0	1	1	0	0	0	0	0	0	0	0	0	0	0	0	0	0
1	0	53	160	60	23.4375	81	0	1	1	0	1	1	0	0	1	0	1	1	0	0	1	0	0	0	0	0
1	0	67	167	70	25.0995	90	0	1	0	0	0	1	0	1	0	0	0	1	0	0	1	0	0	0	0	0
1	0	71	178	90	28.4055	85	0	0	0	0	0	0	1	0	1	1	0	0	0	0	1	0	0	0	1	0
1	1	75	164	78	29.0006	97	0	0	0	0	0	1	0	0	1	0	0	1	0	0	1	0	0	0	0	0
1	1	29	160	60	23.4375	73.3	0	0	0	0	0	0	0	0	1	0	0	0	0	0	0	0	0	0	0	0
1	0	48	174	76	25.1024	90	1	0	0	0	0	0	0	0	0	0	0	1	0	0	1	0	1	0	0	0
1	0	52	170	55	19.0311	72	0	0	0	0	0	0	0	0	1	0	0	0	0	0	0	0	0	0	0	0
1	0	37	175	79	25.7959	90	0	0	0	0	0	0	0	0	0	0	0	0	0	0	1	0	0	0	0	0
1	1	55	165	80	29.3848	94	0	1	1	0	1	0	0	0	0	0	0	0	0	0	1	0	0	0	0	0
1	0	55	180	90	27.7778	87	0	0	0	0	0	0	0	0	1	0	0	0	0	0	0	0	1	0	0	0
1	1	53	168	76	26.9274	88	0	1	1	0	0	0	0	0	0	0	0	0	0	0	0	0	0	1	0	0
1	1	70	157	87	35.2955	100	0	0	0	0	0	0	0	0	0	0	0	0	0	0	0	0	0	0	0	0
1	0	53	170	67	23.1834	84	0	0	0	0	0	0	0	0	0	0	0	0	0	0	0	0	0	0	0	0
1	1	53	165	67	24.6097	85	0	0	0	0	0	1	0	0	0	0	0	0	0	0	1	0	0	0	0	0
1	0	43	174	78	25.763	80	0	0	0	0	0	0	0	0	0	0	0	0	0	0	0	0	0	0	0	0
1	0	55	165	55	20.202	67	0	0	0	0	0	1	0	0	0	0	0	0	0	0	1	0	0	0	0	0
1	0	40	160	50	19.5312	67	0	0	0	0	0	0	0	0	0	0	0	0	0	0	1	0	0	0	1	0
1	1	63	165	74	27.1809	80	0	0	0	0	0	0	0	0	1	0	1	1	0	0	1	0	0	0	0	0
1	0	62	173	80	26.7299	93	0	0	0	0	0	0	0	0	1	0	0	1	0	0	0	0	0	0	0	0
1	0	56	170	84	29.0657	98	0	1	1	0	0	0	0	0	0	0	0	1	0	0	0	0	0	0	0	0
1	1	50	160	61	23.8281	90	0	1	0	0	0	1	0	0	0	0	0	0	0	0	1	0	0	0	0	0
1	1	57	170	77	26.6436	71	0	1	0	0	0	1	1	0	1	0	0	0	0	0	1	0	0	0	0	0
1	1	70	152	70	30.2978	84	0	0	0	0	0	0	0	0	1	0	0	0	0	0	1	0	1	0	1	0
1	1	38	161	94	36.264	100	0	1	1	0	0	0	0	0	1	0	0	0	0	0	0	0	0	0	0	0
1	1	55	158	67	26.8386	85	0	0	0	0	0	1	0	0	0	0	0	0	0	0	0	0	0	0	0	0
1	0	62	165	70	25.7117	80	1	0	1	0	0	1	0	0	0	0	1	0	0	0	1	1	0	0	0	0
1	0	66	160	40	15.625	71	0	1	0	0	0	0	0	0	0	0	0	0	0	0	0	0	0	0	0	0
1	0	40	165	65	23.8751	70	0	0	1	0	0	0	1	0	1	0	0	1	0	0	0	1	0	0	0	0
1	0	33	174	65	21.4692	70	0	1	0	0	0	0	0	0	0	0	0	0	1	1	1	0	0	0	0	0
1	0	42	175	72	23.5102	92	1	0	0	1	0	0	1	0	0	0	0	0	1	0	0	0	0	0	0	0
1	0	45	157	70	28.3987	90	0	1	0	0	0	0	0	0	0	0	0	0	1	1	1	0	0	0	0	0
1	1	54	162	64	24.3865	92	0	1	1	0	0	0	0	0	0	0	0	0	1	1	1	0	0	0	0	0
1	1	39	162	50	19.052	90	1	1	0	0	1	1	1	0	0	1	0	1	1	1	1	0	0	1	0	0
1	1	43	164	63	23.4236	88	1	1	1	0	0	1	1	0	1	0	0	0	1	1	1	0	0	0	0	0
1	1	34	158	58	23.2335	78	1	1	0	0	0	0	0	0	0	0	0	0	1	0	1	1	0	0	0	0
1	1	58	148	50	22.8269	83	0	0	0	1	0	1	0	1	0	0	0	0	1	0	1	0	0	0	0	0
1	1	52	162	60	22.8624	72	0	0	1	0	0	1	0	0	0	0	0	0	1	1	1	0	1	0	0	0
1	0	39	170	90	31.1419	80	0	1	1	1	0	0	0	0	0	0	0	0	1	1	1	0	0	0	0	0
1	0	52	176	93	30.0232	80	1	1	0	0	0	0	0	0	0	1	0	0	1	1	1	1	0	0	0	0
1	0	41	180	82	25.3086	90	0	0	0	0	0	0	0	0	0	1	0	1	1	0	1	0	0	0	0	0
1	1	59	165	40	14.6924	70	1	0	0	1	0	0	0	0	0	0	0	0	1	0	1	0	1	0	0	0
1	0	33	174	90	29.7265	71	0	0	1	0	0	0	0	0	1	0	0	0	1	1	1	0	0	1	0	0
1	0	61	183	85	25.3815	69	0	0	0	0	0	0	1	0	1	0	0	1	1	1	1	0	0	0	0	0
1	0	61	184	105	31.0137	96	1	1	1	0	1	0	0	0	1	1	1	0	1	1	1	0	0	0	0	0
1	1	55	160	58	22.6562	67	0	0	0	0	0	0	0	0	0	0	0	0	1	0	0	0	1	0	0	0
1	1	62	160	62	24.2188	78	0	0	0	1	1	0	0	0	0	0	0	0	1	1	1	0	0	0	0	0
1	0	46	168	70	24.8016	90	0	0	0	1	1	0	0	0	0	0	0	0	1	1	1	0	0	0	0	0
1	1	49	162	65	24.7676	92	0	0	0	0	0	1	0	0	0	0	0	0	1	1	1	1	0	0	0	0
1	1	56	164	85	31.6032	71	0	0	1	0	0	0	0	0	0	0	0	0	1	0	0	0	0	0	0	0
1	1	56	158	55	22.0317	73	0	0	0	0	0	0	0	0	0	0	0	0	1	0	0	0	1	0	0	0
1	1	63	162	65	24.7676	72	0	0	0	0	0	0	0	0	0	0	0	0	1	0	0	0	0	0	0	0
1	0	66	168	60	21.2585	75	1	0	0	0	0	0	0	0	0	0	0	0	1	0	0	0	1	1	0	0
1	0	41	170	70	24.2215	85	0	0	1	0	0	0	0	0	0	0	0	0	1	1	1	0	0	0	0	0
1	0	32	182	95	28.6801	80	1	1	1	0	0	1	0	0	1	0	0	1	1	1	1	0	0	0	1	0
1	0	55	175	80	26.1224	81	0	0	0	0	0	0	0	0	0	0	0	0	1	1	1	0	0	0	1	0
1	0	27	170	88	30.4498	95	0	1	1	0	1	0	0	0	0	0	0	0	1	0	0	0	1	0	0	0
1	1	55	150	67	29.7778	98	0	0	0	0	0	0	0	0	1	0	0	0	1	1	0	0	1	0	0	0
1	0	60	176	80	25.8264	90	0	1	0	1	1	0	0	0	1	0	0	0	1	0	0	0	0	0	0	0
1	1	54	162	69	26.2917	84	0	0	1	1	0	0	0	0	0	0	0	0	1	1	0	0	0	0	0	0
1	1	60	156	51	20.9566	83	0	0	0	1	0	0	0	0	0	0	0	0	1	1	1	0	0	0	0	0
1	0	61	175	70	22.8571	100	1	1	0	1	0	0	0	0	0	0	0	0	1	0	0	0	0	0	0	0
1	0	49	177	80	25.5354	92	1	1	0	1	1	0	0	0	0	0	0	0	1	0	0	0	0	0	0	0
1	1	65	170	76	26.2976	83	0	0	0	1	0	0	0	0	0	0	0	0	1	0	0	0	0	0	0	0
1	0	44	175	92	30.0408	90	0	0	1	1	1	1	0	0	0	0	0	0	1	1	1	0	0	0	0	0
1	1	68	165	66	24.2424	77	0	0	0	0	0	1	0	0	0	0	0	0	1	0	0	0	0	0	0	0
1	0	46	170	75	25.9516	90	1	0	0	0	0	1	0	0	0	0	0	0	1	1	1	0	0	0	0	0
1	1	69	162	60	22.8624	87	0	0	0	1	0	1	0	0	0	0	0	0	1	0	0	0	0	0	0	0
1	0	57	160	57.5	22.4609	93	0	0	0	0	0	1	0	0	0	0	0	0	1	0	0	0	1	0	0	0
1	0	70	170	83	28.7197	88	1	1	0	1	1	1	0	0	0	0	0	0	1	0	0	0	0	1	0	0
1	1	34	163	70	26.3465	77	0	0	0	0	0	1	0	0	0	0	0	0	1	0	0	0	0	0	0	0
1	0	60	178	68	21.4619	86	0	0	0	0	0	0	0	0	1	0	0	0	1	1	1	0	0	0	0	0
1	1	55	166	71	25.7657	100	0	1	0	0	0	0	0	0	1	0	0	0	1	1	0	0	0	1	0	0
1	1	73	163	66	24.841	83	0	0	0	0	0	0	0	0	0	0	0	0	1	0	1	0	0	0	0	0
1	0	69	178	82.5	26.0384	80	1	0	0	0	0	0	0	0	0	0	0	0	1	0	0	0	1	0	0	0
1	1	73	157	50	20.2848	73	0	0	0	0	0	0	0	0	0	0	0	0	1	0	0	0	1	0	0	0
1	1	57	165	59	21.6713	83	0	0	0	0	0	0	0	0	1	0	0	0	1	1	1	0	1	0	0	0
1	1	61	163	66	24.841	80	0	0	0	1	0	0	0	0	0	1	0	0	1	1	1	1	0	0	0	0
1	0	64	170	71	24.5675	75	0	0	0	0	0	1	0	0	1	1	0	0	1	0	0	0	0	0	0	0
1	0	40	170	73	25.2595	79	0	0	0	0	0	0	0	0	1	1	0	0	1	1	1	0	0	0	0	0
1	1	74	150	58	25.7778	85	0	0	0	1	0	0	0	0	0	0	0	0	1	0	0	0	0	0	0	0
1	1	63	162	67	25.5296	78	0	0	0	1	0	0	0	0	0	0	0	0	1	0	0	0	0	1	0	0
1	0	37	172	74	25.0135	88	0	0	0	0	0	0	0	0	0	0	0	0	1	0	0	0	0	0	0	0
1	0	59	170	75	25.9516	90	1	1	0	0	0	1	0	0	1	0	0	0	1	1	1	0	0	0	0	0
1	1	60	156	67	27.5312	80	0	0	0	1	0	1	0	0	1	0	0	0	1	0	0	0	1	0	0	0
1	1	51	162	67	25.5296	92	0	0	0	0	0	0	0	0	0	0	0	0	1	1	1	0	0	0	0	0
1	1	51	160	64	25	74	0	0	0	0	0	1	0	0	0	1	0	1	1	1	0	0	0	0	0	0
1	1	55	165	62.5	22.9568	89	0	0	0	0	0	1	1	0	1	0	0	0	1	0	0	0	0	1	0	0
1	1	46	162	65	24.7676	90	0	0	0	0	0	0	0	0	0	0	0	0	1	0	0	1	0	0	0	0
1	1	42	161	68	26.2336	90	0	0	0	0	0	0	0	0	0	0	0	0	1	0	0	0	0	0	0	0
1	1	63	165	60	22.0386	84	0	0	0	0	0	1	0	1	0	0	0	0	1	1	1	0	0	0	0	0
1	0	42	167	67	24.0238	75	0	1	0	0	0	1	0	0	0	0	0	0	1	1	0	1	0	0	0	0
1	1	64	153	41	17.5146	65	0	0	0	0	0	1	1	0	1	0	0	0	1	1	1	0	0	0	0	0
1	1	45	163	65	24.4646	84	0	1	1	1	0	1	0	0	0	0	0	0	1	0	0	0	0	0	0	0
1	0	54	170	70	24.2215	76	0	1	1	0	0	0	0	0	0	0	0	0	1	1	1	0	0	0	0	0
1	1	54	162	68	25.9107	74	0	1	1	0	0	0	0	0	0	0	0	0	1	0	0	0	0	0	0	0
1	0	34	173	85	28.4005	90	1	0	1	1	1	0	0	0	0	0	1	1	1	0	0	0	0	0	0	0
1	0	44	170	71	24.5675	85	0	1	1	0	1	0	0	0	1	0	0	0	1	1	0	0	0	0	0	0
1	1	62	165	50	18.3655	64	0	0	1	0	0	0	1	0	1	0	0	0	1	0	0	0	1	0	0	0
1	0	53	181	91	27.7769	87	1	1	0	0	0	1	1	0	1	1	0	0	1	1	0	0	0	0	0	0
1	1	57	150	74	32.8889	98	0	0	0	0	0	0	0	0	1	0	0	1	1	0	0	0	1	0	0	0
1	0	32	168	73	25.8645	90	1	0	0	0	0	0	0	0	0	0	0	0	1	1	1	0	0	1	0	0
1	1	40	160	86	33.5938	97	0	0	0	1	1	0	0	0	0	0	0	0	1	0	0	0	0	0	0	0
1	1	59	160	55	21.4844	71	0	0	0	0	0	1	0	0	0	0	0	0	1	0	0	0	0	1	0	0
1	0	59	178	80	25.2493	78	0	0	0	1	0	1	0	0	0	0	0	0	1	1	1	1	1	0	0	0
1	1	63	158	50	20.0288	90	0	0	0	0	0	0	1	0	0	0	0	0	1	1	1	0	0	0	0	0
1	0	64	170	85	29.4118	95	0	1	1	0	1	1	0	0	0	0	0	0	1	0	1	1	1	0	0	0
1	0	34	174	60	19.8177	73	1	1	0	1	1	1	0	0	0	0	0	0	1	1	1	0	0	0	0	0
1	0	32	167	60	21.5139	65	1	1	0	1	0	1	0	0	0	0	1	0	1	0	0	0	0	1	0	0
1	1	46	162	65	24.7676	99	0	0	0	0	0	0	0	0	0	0	0	0	1	1	0	0	1	0	0	0
1	1	61	168	73	25.8645	87	0	1	0	0	0	0	0	0	1	0	0	0	1	0	0	0	0	0	0	0
1	0	58	172	73	24.6755	90	1	1	0	0	0	1	0	0	1	0	0	1	1	0	0	0	0	0	0	0
1	1	40	159	70	27.6888	78	0	0	1	0	1	0	0	0	0	0	0	0	1	0	0	0	1	0	0	0
1	1	51	165	85	31.2213	73	0	0	0	1	1	1	1	0	1	0	0	1	1	0	0	0	0	0	0	0
1	1	52	164	61	22.68	96	0	0	0	0	0	0	0	0	0	0	0	0	1	0	0	0	0	0	0	0
1	0	44	174	86	28.4053	87	0	0	0	0	1	0	1	0	1	0	0	0	1	1	1	0	0	0	0	0
1	0	43	173	90	30.0712	95	1	1	1	1	1	0	0	0	0	0	0	0	1	1	1	0	0	0	0	0
1	1	40	163	60	22.5827	72	0	0	0	1	1	0	0	0	0	0	0	0	1	1	1	0	0	0	0	0
1	1	58	165	70	25.7117	90	0	0	0	0	0	0	1	0	1	0	0	0	1	1	1	0	0	0	1	0
1	0	49	170	67	23.1834	84	1	1	1	1	0	0	1	0	0	0	1	1	1	0	0	0	0	0	0	0
1	1	53	166	60	21.7738	77	0	0	0	0	0	1	0	0	0	0	0	0	1	1	1	0	1	0	0	0
1	1	70	150	84	37.3333	98	0	0	0	1	0	0	0	0	1	0	0	1	1	1	0	0	0	0	0	0
1	0	55	175	75	24.4898	62	1	1	0	0	0	0	1	0	1	0	1	1	1	0	0	0	0	1	0	0
1	1	63	158	65	26.0375	73	0	0	0	0	0	0	0	1	0	0	0	0	1	1	1	0	0	0	0	0
1	0	59	175	90	29.3878	95	0	1	0	0	0	1	1	1	1	0	1	0	1	1	0	0	0	0	0	0
1	1	61	158	54	21.6311	71	0	0	0	0	0	0	0	0	0	0	1	0	1	0	0	0	1	0	0	0
1	1	51	156	60	24.6548	76	0	0	0	1	0	0	0	0	0	0	0	0	1	0	0	0	1	0	0	0
1	0	45	173	71	23.7228	71	0	0	0	1	1	0	0	0	0	0	0	0	1	0	0	0	0	0	0	0
1	0	65	175	70	22.8571	65	0	0	0	0	0	0	0	0	0	0	0	0	1	1	1	0	0	0	1	1
1	1	62	165	50	18.3655	68	0	0	1	0	0	0	1	1	0	0	0	0	1	1	1	0	0	0	0	0
1	0	44	170	72	24.9135	75	0	1	1	0	0	0	0	0	0	0	0	0	1	0	0	0	0	0	0	0
1	1	75	164	65	24.1672	75	0	0	0	0	0	1	1	0	1	0	1	0	1	0	0	0	1	0	0	0
1	1	51	159	70	27.6888	90	0	0	0	0	0	1	0	1	0	0	0	0	1	0	0	0	0	0	0	0
1	1	73	159	65	25.711	68	0	0	0	0	0	1	1	1	0	0	0	0	1	1	1	0	0	0	0	0
1	1	56	160	45	17.5781	63	0	0	0	0	0	0	0	0	0	0	0	0	1	1	1	0	0	0	1	1
1	1	69	162	70	26.6728	67	0	0	1	0	0	0	1	0	1	0	0	1	1	1	1	0	0	0	0	0
1	1	60	170	70	24.2215	65	0	1	1	0	0	0	0	1	0	0	0	0	1	1	0	0	0	0	0	0
1	1	52	160	66	25.7812	78	0	0	0	1	0	0	0	0	0	1	0	0	1	1	1	0	0	0	0	0
1	0	46	170	78	26.9896	75	1	1	0	1	1	0	0	0	0	0	0	0	1	0	1	0	0	0	0	0
1	1	33	160	57	22.2656	80	0	0	0	1	1	0	0	0	1	0	0	0	1	0	1	0	1	0	1	0
1	0	65	170	60	20.7612	66	0	1	1	0	0	1	0	1	0	1	0	1	1	0	1	0	1	0	0	0
1	1	38	160	48	18.75	68	0	1	0	1	0	0	0	0	0	0	0	0	1	0	1	0	0	0	0	0
1	0	62	160	75	29.2969	90	1	0	0	1	1	0	0	0	0	0	0	0	1	1	1	0	0	0	0	0
1	1	54	162	70	26.6728	100	0	0	0	0	0	0	0	1	0	0	0	0	1	0	1	0	1	0	0	0
1	0	32	174	75	24.7721	83	1	0	1	1	1	0	1	1	0	0	0	0	1	0	1	1	0	0	1	0
1	0	51	170	70	24.2215	75	0	1	1	0	0	0	0	0	0	0	0	1	1	1	1	0	0	0	0	0
1	0	61	170	60	20.7612	79	1	0	0	1	0	1	0	0	0	0	0	0	1	0	1	1	0	0	0	0
1	0	56	170	60	20.7612	64	0	0	0	0	0	1	0	0	0	0	0	0	1	1	1	0	0	1	0	0
1	1	56	160	55	21.4844	76	0	0	0	0	0	0	0	0	0	0	0	0	1	1	1	0	0	0	0	0
1	0	44	180	53	16.358	63	0	1	0	0	0	0	0	0	1	0	1	0	1	1	1	0	0	0	0	0
1	0	53	165	67	24.6097	64	1	1	1	0	0	0	0	1	1	0	0	0	1	0	1	0	0	0	0	0
1	1	66	164	76	28.257	90	0	0	0	0	0	0	1	0	1	0	0	0	1	0	1	0	0	0	0	0
1	0	55	167	63	22.5896	71	0	0	0	0	0	0	0	0	0	0	0	0	1	1	1	0	0	0	0	0
1	0	46	170	75	25.9516	80	0	0	0	0	0	0	0	0	0	1	0	1	1	1	1	0	0	0	0	0
1	0	60	156	54	22.1893	95	0	0	0	0	0	0	0	0	0	0	0	0	1	1	1	0	0	0	0	0
1	1	68	160	65	25.3906	67	0	0	1	1	1	0	1	1	1	0	0	1	1	1	1	0	0	0	0	0
1	1	71	160	80	31.25	72	0	0	0	0	0	0	1	0	1	0	0	1	1	1	1	0	1	1	0	0
1	0	39	172	70	23.6614	80	1	1	0	0	0	0	0	0	1	0	1	1	1	1	0	0	0	0	0	0
1	1	66	160	55	21.4844	70	0	0	0	0	0	0	1	0	1	0	0	0	1	0	1	0	1	0	0	0
1	1	52	163	68	25.5937	68	0	0	0	0	0	0	0	0	0	0	0	0	1	0	1	1	0	0	0	0
1	1	62	160	68	26.5625	85	0	0	0	0	0	1	0	0	1	0	0	1	1	0	1	0	1	0	0	0
1	0	82	176	82	26.4721	92	0	1	0	0	0	0	0	0	1	0	0	0	1	1	1	1	0	0	0	0
1	1	51	163	68	25.5937	73	0	0	0	0	0	1	0	1	0	1	0	0	1	0	1	1	0	0	0	0
1	1	51	158	55	22.0317	83	0	1	0	1	0	1	0	0	0	0	0	0	1	1	1	0	1	0	0	0
1	0	45	170	75	25.9516	80	1	1	1	1	0	1	0	0	0	0	0	0	1	1	1	0	0	0	0	0
1	1	31	160	57	22.2656	78	0	0	0	1	0	1	0	0	0	0	0	0	1	0	0	0	1	0	0	0
1	1	59	168	59	20.9042	77	0	0	0	0	0	0	0	1	0	0	0	0	1	1	1	0	1	0	0	0
1	1	62	160	60	23.4375	68	0	0	0	0	0	0	0	0	0	0	0	0	1	1	1	0	1	0	0	0
1	0	37	186	90	26.0146	70	1	1	0	1	1	0	0	0	0	0	0	1	1	1	1	0	0	0	0	0
1	0	28	190	90	24.9307	60	1	0	0	1	0	1	0	0	0	0	0	0	1	1	1	0	1	1	0	0
0	1	67	160	60	23.4375	88	0	0	0	0	0	1	0	1	0	0	0	1	1	1	0	0	0	0	0	0
0	1	52	153	60	25.6312	90	0	0	0	0	0	0	0	0	0	0	0	0	0	0	0	0	0	0	0	0
0	0	56	170	80	27.6817	90	0	0	0	0	0	0	0	0	1	0	0	1	0	0	1	0	0	0	0	0
0	1	57	165	62	22.7732	82	0	0	0	0	0	0	0	0	0	0	0	0	0	0	0	0	0	0	0	0
0	1	57	165	54	19.8347	67	0	0	0	0	0	0	0	0	0	0	0	0	0	0	0	0	0	0	0	0
0	1	52	163	80	30.1103	90	0	0	1	0	0	0	0	0	1	0	0	0	0	1	1	0	0	0	0	0
1	1	33	158	66	26.4381	75	0	0	0	0	0	0	0	0	0	0	0	0	0	0	0	0	0	0	0	0
0	0	61	170	65	22.4913	63	0	0	1	0	0	0	1	0	1	0	0	0	0	0	0	0	0	0	0	0
0	1	65	170	70	24.2215	80	0	1	0	0	0	0	0	0	0	0	0	0	0	0	1	0	0	0	0	0
0	1	56	165	86	31.5886	78	0	1	0	0	0	0	0	0	0	0	0	0	0	0	0	0	0	0	0	0
1	1	31	160	59	23.0469	69	0	1	0	0	1	0	1	0	1	0	0	0	0	0	0	0	0	0	0	0
1	1	43	170	75	25.9516	63	0	1	0	0	0	0	1	0	0	0	1	1	0	0	1	0	0	0	0	0
0	1	59	170	80	27.6817	78	0	0	1	0	0	1	0	0	0	0	0	0	0	0	0	0	0	0	0	0
0	1	47	152	68	29.4321	78	0	1	0	0	0	0	0	0	1	0	0	1	0	0	0	0	0	0	0	0
0	1	51	164	76	28.257	80	0	0	0	0	0	0	1	0	1	0	1	1	0	0	0	0	0	0	0	0
0	1	45	165	68	24.977	74	0	1	0	0	0	0	0	1	0	0	0	0	0	0	0	0	0	0	0	0
0	1	70	163	63	23.7118	59	0	1	0	0	1	1	1	1	1	0	1	0	0	0	0	0	0	0	0	0
0	1	48	158	66	26.4381	73	0	0	1	0	0	0	0	0	0	0	1	0	0	0	0	0	0	0	0	0
0	1	57	160	78	30.4688	68	0	1	0	0	0	0	0	0	0	0	0	0	0	0	0	0	0	0	0	0
0	0	66	167	68	24.3824	64	0	1	0	0	0	0	0	0	0	0	0	0	0	0	0	0	0	0	0	0
0	1	57	170	64	22.1453	67	0	1	0	0	0	0	0	0	0	0	0	0	0	0	0	0	0	0	0	0
1	1	35	166	74	26.8544	78	0	1	0	0	0	0	1	1	0	0	0	0	0	0	0	0	0	0	0	0
0	0	59	175	60	19.5918	69	0	0	1	0	0	0	0	0	0	0	0	0	0	0	0	0	0	0	0	0
0	1	36	160	51	19.9219	78	0	1	0	0	0	1	1	0	1	0	1	0	0	0	0	0	0	0	0	0
0	1	35	165	55	20.202	83	0	1	0	0	0	1	0	1	0	0	0	0	0	0	1	0	0	0	0	0
0	0	39	178	95	29.9836	82	0	1	0	0	0	1	1	1	0	0	0	0	0	0	0	0	0	0	0	0
0	0	41	176	90	29.0548	79	0	0	0	0	0	0	0	0	0	0	0	0	0	0	0	0	0	0	0	0
0	0	65	173	87	29.0688	79	1	0	0	0	0	0	1	0	1	0	0	1	0	0	0	0	0	0	0	0
0	0	60	170	56	19.3772	82	0	1	0	0	0	0	0	1	0	0	0	0	0	0	0	0	0	0	0	0
0	0	66	175	75	24.4898	92	0	0	1	0	0	0	0	0	0	1	0	0	0	0	1	1	0	0	0	0
0	0	48	172	85	28.7317	78	0	0	0	0	0	0	0	0	0	0	0	0	0	0	0	0	0	0	0	0
0	1	53	158	49	19.6283	78	0	1	0	0	0	0	0	0	1	0	0	0	0	0	0	0	0	0	0	0
0	0	41	170	74	25.6055	79	0	1	0	0	0	0	0	1	0	1	0	1	0	0	0	0	0	0	0	0
0	1	20	162	49	18.6709	87	1	0	1	0	1	0	0	0	0	0	0	0	0	0	0	0	0	0	0	0
0	0	39	172	60	20.2812	84	1	0	0	0	0	0	0	0	0	0	0	0	0	0	0	0	0	0	0	0
0	0	38	173	65	21.7181	78	0	0	0	0	0	0	0	1	0	0	0	0	0	0	1	0	0	1	0	0
0	0	61	175	89	29.0612	82	0	0	0	0	0	0	1	1	0	0	0	0	0	0	0	0	0	0	0	0
0	0	65	183	78	23.2912	84	0	0	0	0	0	0	0	0	0	0	0	1	0	0	0	0	0	0	0	0
0	0	51	168	80	28.3447	87	1	0	1	0	0	0	0	0	0	0	0	0	0	0	0	0	0	0	0	0
0	0	43	165	81	29.7521	72	1	0	0	0	0	0	0	0	0	0	0	0	0	0	0	0	0	0	0	0
0	1	60	170	65	22.4913	72	0	1	0	0	0	0	0	0	0	0	0	0	0	0	0	0	0	0	0	0
0	1	46	158	54	21.6311	67	0	1	0	0	0	0	0	0	1	0	1	0	0	0	0	0	0	0	0	0
0	0	52	170	78	26.9896	84	0	1	0	0	0	0	0	1	1	0	0	0	0	0	0	0	0	0	0	0
0	0	57	174	89	29.3962	85	0	0	0	0	0	0	1	0	1	0	0	0	0	0	0	0	0	0	0	0
0	0	27	173	78	26.0617	80	1	0	0	0	1	0	0	0	0	0	0	0	0	0	0	0	0	0	0	0
0	0	60	173	70	23.3887	79	0	1	0	0	0	0	0	0	0	1	0	1	0	0	0	0	0	0	0	0
0	0	60	170	85	29.4118	80	0	1	1	0	1	0	0	0	0	0	0	0	0	0	0	0	0	0	0	0
0	0	59	175	90	29.3878	83	0	1	0	0	0	0	1	1	1	0	0	1	0	0	1	0	0	0	0	0
0	1	58	155	58	24.1415	82	0	1	0	0	1	0	1	0	1	0	0	1	0	0	1	0	0	0	0	0
0	1	61	151	55	24.1217	84	0	0	1	0	0	1	0	0	1	0	1	1	0	0	0	0	0	0	0	0
0	0	36	175	76	24.8163	76	0	0	0	0	0	0	1	0	1	0	0	0	0	0	0	0	0	0	0	0
0	1	58	158	60	24.0346	80	0	1	0	0	0	0	0	0	0	0	0	0	0	0	0	0	0	0	0	0
0	0	58	180	80	24.6914	78	0	1	0	0	0	0	0	0	1	0	0	1	0	0	0	0	0	0	0	0
0	1	64	160	52	20.3125	78	0	1	0	0	0	0	0	0	1	0	0	0	0	0	1	0	0	0	0	0
0	0	65	180	90	27.7778	85	1	0	0	0	0	0	0	1	0	1	0	0	0	0	1	0	0	0	0	0
0	0	63	170	79	27.3356	76	1	0	1	0	0	0	0	0	0	0	0	0	0	0	0	0	0	0	0	0
0	1	67	165	62	22.7732	84	0	1	0	0	0	0	0	0	0	0	0	0	0	0	1	0	0	0	0	0
0	1	38	160	55	21.4844	80	0	1	0	0	1	0	0	0	0	0	0	0	0	0	0	0	0	0	0	0
0	1	68	160	50	19.5312	78	0	1	0	0	1	0	0	1	0	0	0	0	0	0	0	0	0	0	0	0
0	0	54	175	80	26.1224	75	0	0	0	0	0	0	0	0	0	0	0	0	0	0	0	0	0	0	0	0
0	1	45	160	70	27.3438	84	0	1	1	0	1	0	0	0	0	0	0	1	0	0	0	0	0	0	0	0
0	1	46	160	60	23.4375	80	0	1	1	0	1	1	0	0	0	0	0	0	0	0	0	0	0	0	0	0
0	1	46	158	55	22.0317	77	0	1	0	0	1	1	0	1	0	0	0	1	0	0	0	0	0	0	0	0
0	1	27	162	97	36.9608	75	0	1	1	0	1	0	0	0	0	0	0	0	0	0	0	0	1	0	0	0
0	1	60	150	65	28.8889	90	0	1	0	0	1	0	0	0	0	0	0	0	0	0	0	0	1	0	0	0
0	1	74	160	50	19.5312	80	0	1	0	0	1	0	0	0	0	0	0	0	0	0	0	0	0	0	0	0
0	0	65	183	78	23.2912	82	0	0	0	0	1	0	0	0	0	0	0	0	0	0	0	0	0	0	0	0
0	1	63	165	67	24.6097	84	0	0	0	0	0	0	0	0	0	0	0	0	0	0	0	0	0	0	0	0
0	0	41	170	84	29.0657	70	0	0	0	0	0	0	0	0	0	0	0	0	0	0	0	0	0	0	0	0
0	0	48	174	89	29.3962	79	0	0	0	0	0	0	0	0	0	0	0	0	0	0	0	0	0	0	0	0
0	1	42	165	65	23.8751	80	0	1	0	0	1	0	0	0	0	0	0	0	0	0	0	0	0	0	0	0
0	1	36	155	52	21.6441	70	0	1	0	0	0	0	0	0	0	0	0	0	0	0	0	0	0	0	0	0
0	1	38	160	55	21.4844	78	1	0	1	0	0	0	0	0	0	0	0	0	0	0	0	0	0	0	0	0
0	1	68	160	57	22.2656	81	0	0	0	0	1	0	0	0	0	0	0	0	0	0	0	0	0	0	0	0
0	0	42	170	68	23.5294	85	1	1	1	0	1	0	0	0	0	0	0	0	0	0	0	0	0	0	0	0
0	1	60	163	50	18.8189	82	0	0	0	0	0	0	0	0	0	0	0	0	0	0	0	0	0	0	0	0
0	0	55	170	65	22.4913	80	0	1	0	0	0	0	0	0	0	0	0	0	0	0	0	0	0	0	0	0
0	1	60	158	52	20.83	74	0	0	0	0	0	0	0	0	0	0	0	0	0	0	0	0	0	0	0	0
0	0	20	172	70	23.6614	91	0	0	0	0	1	0	0	0	0	0	0	0	0	0	0	0	0	0	0	0
0	1	39	158	60	24.0346	73	1	0	0	0	1	0	0	0	0	0	0	0	0	0	0	0	0	0	0	0
0	0	51	168	62	21.9671	85	0	0	0	0	0	0	0	0	0	0	0	0	0	0	0	0	0	0	0	0
0	0	62	162	56	21.3382	79	0	0	0	0	1	0	0	0	0	0	0	0	0	0	0	0	0	0	0	0
0	1	54	158	57	22.8329	93	0	0	0	1	0	0	0	0	0	0	0	0	0	1	1	0	0	0	0	0
0	1	46	162	82	31.2452	88	0	1	1	0	0	0	0	0	1	0	0	0	0	0	0	1	0	0	0	0
0	1	56	168	72	25.5102	90	0	0	1	0	0	0	0	0	0	0	0	0	0	1	1	0	0	0	0	0
0	1	59	150	60	26.6667	72	0	0	0	1	0	0	1	1	1	1	0	0	0	1	1	0	0	0	0	0
0	1	61	155	67	27.8876	90	0	0	0	0	0	0	0	0	0	0	0	0	0	1	1	0	0	0	0	0
0	1	45	170	72	24.9135	70	0	0	0	0	0	0	0	1	0	0	0	0	0	0	0	0	0	0	0	0
0	1	55	160	60	23.4375	71	0	0	0	1	0	0	0	0	0	0	0	0	0	0	0	0	1	0	0	0
0	0	33	171	62	21.2031	75	0	0	1	0	0	0	0	0	0	0	0	0	0	0	0	0	0	1	0	0
0	1	39	168	50	17.7154	73	0	0	0	1	0	0	0	0	0	0	0	0	0	1	1	1	0	0	0	0
0	1	60	164	67	24.9108	65	0	0	0	0	0	0	1	0	1	0	0	0	0	0	0	0	0	0	0	0
0	1	33	168	70	24.8016	99	1	0	0	1	0	0	0	0	0	0	0	0	0	0	0	0	0	0	0	0
0	1	27	172	66	22.3094	87	0	0	1	0	1	0	0	0	0	0	0	0	0	1	1	0	0	0	0	0
0	0	38	173	80	26.7299	89	1	1	0	1	1	1	0	0	0	0	0	0	0	1	1	0	0	0	0	0
0	1	58	157	78	31.6443	78	0	0	0	1	1	0	0	1	0	0	0	1	0	0	0	0	0	1	0	0
0	1	59	161	63	24.3046	73	0	0	1	1	0	0	0	0	0	0	0	1	0	0	0	0	0	0	0	0
0	1	59	160	63	24.6094	73	0	0	0	0	0	0	0	0	0	0	1	1	0	0	0	0	0	0	0	0
0	1	57	168	60	21.2585	96	1	0	0	0	0	0	1	0	1	1	1	1	0	0	0	0	0	0	0	0
0	0	68	170	56	19.3772	73	1	1	0	0	0	0	0	0	0	0	0	0	0	0	0	0	0	0	0	0
0	0	57	178	91	28.7211	75	1	1	0	1	1	0	0	0	0	0	0	1	0	0	0	0	0	0	0	0
0	0	43	168	78	27.6361	72	1	1	0	1	1	0	0	0	1	0	0	0	0	0	0	0	0	0	0	0
0	1	69	155	50	20.8117	91	0	0	0	0	0	0	1	1	1	1	0	0	0	0	0	0	0	0	0	0
0	0	58	160	70	27.3438	84	0	1	0	1	1	0	0	0	0	0	0	1	0	0	0	0	0	0	0	0
0	1	65	162	66	25.1486	77	0	0	0	1	0	0	1	0	1	0	0	1	0	0	0	0	0	0	0	0
0	1	56	160	80	31.25	62	0	0	0	1	1	0	0	0	0	0	0	1	0	0	0	0	0	0	0	0
0	1	46	163	75	28.2284	74	0	0	0	0	1	0	0	0	0	0	0	0	0	0	0	0	0	0	0	0
0	0	67	174	101	33.3598	74	0	0	0	1	1	0	0	0	1	0	0	1	0	0	0	0	0	0	1	0
0	1	61	160	63	24.6094	70	0	0	0	0	0	0	1	0	1	0	0	1	0	0	0	0	0	0	0	0
0	0	49	171	96	32.8306	71	0	1	0	1	1	0	0	0	0	0	0	1	0	0	0	0	0	0	0	0
0	0	59	176	79	25.5036	76	0	1	0	1	1	0	0	0	0	0	0	1	0	0	0	0	0	0	0	0
0	0	53	184	84	24.811	71	1	1	0	0	0	1	0	0	0	0	0	0	0	0	0	0	0	0	0	0
0	0	52	180	92	28.3951	66	1	1	0	0	0	1	0	0	0	0	0	0	0	0	0	0	0	0	0	0
0	0	61	173	70	23.3887	68	1	1	0	0	1	0	1	0	1	0	0	1	0	1	1	0	0	0	0	0
0	0	54	175	72	23.5102	70	1	1	0	0	0	0	0	0	0	0	0	0	0	0	0	1	0	0	1	0
0	0	69	173	68	22.7204	75	1	1	0	0	0	0	0	0	0	0	0	0	0	0	0	0	0	0	0	0
0	1	69	162	70	26.6728	83	0	0	0	0	0	0	0	0	0	0	0	1	0	0	0	0	0	0	0	0
0	0	53	170	62	21.4533	60	1	1	0	0	0	0	0	0	0	0	0	0	0	0	0	0	0	0	0	0
0	1	56	163	63.5	23.9	68	0	0	0	0	0	0	0	0	0	0	0	0	0	0	0	0	1	0	0	0
0	1	59	165	70	25.7117	63	0	0	0	1	1	1	1	0	1	0	0	1	0	0	0	0	0	0	0	0
0	1	66	161	50	19.2894	67	0	0	0	1	0	0	0	0	0	0	0	0	0	0	0	0	0	0	0	0
0	1	48	165	70.1	25.7484	65	0	0	0	0	1	0	0	0	0	0	0	0	0	0	0	0	0	0	0	0
0	0	67	164	60	22.3081	79	1	1	0	0	0	0	0	0	1	0	0	0	0	0	0	0	0	0	0	0
0	0	61	172	79	26.7036	75	0	1	0	1	1	0	1	0	1	1	0	1	0	0	0	0	0	0	0	0
0	0	63	175	78	25.4694	80	0	0	0	1	1	0	0	0	0	0	0	1	0	0	0	0	0	0	0	0
0	0	59	180	80.5	24.8457	66	0	0	0	0	1	0	0	0	0	0	0	1	0	0	0	0	0	0	0	0
0	0	54	174	84	27.7447	68	1	1	0	0	0	0	0	0	1	0	0	1	0	0	0	1	0	0	0	0
0	0	61	178	73	23.04	73	0	0	0	0	0	1	0	0	0	0	0	1	0	1	1	0	0	0	0	0
0	1	59	155	53.5	22.2685	99	0	0	1	0	0	0	0	1	1	0	0	0	0	0	0	0	0	0	0	0
0	1	66	162	61	23.2434	83	0	0	0	0	0	0	0	0	1	1	0	1	0	0	0	0	0	0	0	0
0	1	53	158	63	25.2363	67	0	0	0	1	0	0	0	0	0	0	0	0	0	0	0	0	1	0	0	0
0	0	39	168	74	26.2188	80	1	1	0	0	1	0	0	0	0	0	0	1	0	0	0	0	0	1	0	0
0	0	59	185	73	21.3294	64	1	1	0	0	0	0	0	0	0	0	0	1	0	0	0	0	0	0	0	0
0	1	67	165	74	27.1809	76	0	0	0	1	1	0	0	0	1	0	0	0	0	0	0	0	0	0	0	0
0	0	65	168	60	21.2585	95	1	0	0	0	0	0	0	0	1	1	0	1	0	0	0	0	0	0	0	0
0	0	50	170	65	22.4913	64	1	1	1	0	0	0	0	0	0	0	0	1	0	0	0	0	0	0	0	0
0	0	46	177	73	23.3011	90	1	0	0	0	0	0	0	0	0	1	0	1	0	0	0	1	0	0	0	0
0	1	59	158	70	28.0404	90	0	0	0	0	0	1	0	0	0	0	0	0	0	0	0	0	0	0	0	0
0	0	61	172	72	24.3375	80	0	0	0	0	0	0	0	0	0	0	0	0	0	0	0	0	0	0	0	0
0	1	54	165	67	24.6097	62	0	0	0	0	0	0	0	0	0	0	0	0	0	0	0	1	0	0	0	0
0	0	56	176	102	32.9287	100	0	0	0	1	1	0	1	1	1	0	0	0	0	0	0	1	0	0	0	0
0	1	46	155	72	29.9688	98	0	0	0	1	0	0	1	0	1	0	0	0	0	0	0	0	0	0	0	0
0	1	64	158	69	27.6398	80	0	0	0	1	0	0	0	0	0	0	0	0	0	0	0	0	0	0	0	0
0	1	62	156	51	20.9566	70	0	0	0	0	0	1	0	0	0	0	0	0	0	0	0	0	0	0	0	0
0	0	45	170	76	26.2976	68	0	0	0	1	0	0	0	0	0	0	0	0	0	0	0	0	0	0	0	0
0	1	52	160	45.5	17.7734	87	0	0	0	0	0	0	0	0	0	0	0	1	0	0	0	0	1	0	0	0
0	0	62	164	45	16.7311	92	1	1	0	1	1	0	0	0	0	0	0	0	0	0	0	0	0	0	0	0
0	1	60	168	65	23.03	73	0	0	0	0	0	0	0	0	0	0	0	1	0	1	1	0	0	0	0	0
0	1	46	163	59	22.2063	83	0	0	0	0	0	0	0	0	0	0	0	0	0	0	0	0	0	0	0	0
0	0	40	172	75	25.3515	68	1	1	1	0	0	0	0	0	1	1	0	1	0	1	0	0	0	0	0	0
0	0	37	180	90	27.7778	78	1	1	0	0	1	0	1	1	1	0	1	0	0	1	1	0	0	0	0	0
0	0	38	178	85	26.8274	77	1	0	0	0	0	0	0	0	0	0	0	1	0	0	0	0	0	0	0	0
0	0	59	170	65	22.4913	68	1	1	1	0	0	1	0	0	0	0	0	0	0	0	0	0	0	0	0	0
0	1	29	170	53	18.3391	70	0	0	0	0	0	0	0	0	0	0	0	0	0	0	0	0	0	0	0	0
0	1	51	165	72	26.4463	60	0	0	0	0	0	0	0	0	1	0	0	0	0	0	0	0	1	0	0	0
0	0	45	175	80	26.1224	88	1	1	0	0	0	0	0	0	1	0	0	0	0	0	0	0	0	0	0	0
0	0	54	165	60	22.0386	68	0	0	1	0	0	1	1	0	1	0	0	0	0	1	1	0	0	0	0	0
0	0	35	183	105	31.3536	68	0	1	0	0	0	1	0	0	0	0	0	0	0	0	0	0	0	0	0	0
0	1	57	167	50	17.9282	74	0	0	0	0	0	0	0	0	0	0	0	1	0	0	0	0	1	0	0	0
0	0	51	170	80	27.6817	62	1	1	0	0	0	0	0	0	1	0	0	1	0	0	0	0	0	0	0	0
0	0	36	174	90	29.7265	67	0	1	0	0	0	0	0	0	1	0	1	1	0	0	0	0	0	0	0	0
0	0	65	172	70	23.6614	80	0	0	0	0	0	1	1	1	1	0	0	0	0	0	0	0	0	0	0	0
0	1	71	160	56	21.875	63	0	0	0	0	0	0	1	0	1	1	0	1	0	0	0	0	0	0	0	0
0	0	63	171	63	21.5451	80	1	1	0	0	0	0	0	0	0	0	0	0	0	0	0	0	0	0	0	0
0	1	56	158	63	25.2363	70	0	0	0	0	0	0	0	0	0	0	0	1	0	0	0	0	0	0	0	0
0	1	71	150	57	25.3333	69	0	0	0	0	0	0	0	0	0	1	0	0	0	0	0	0	0	0	0	0
0	0	60	170	85	29.4118	63	1	0	0	0	1	0	0	1	1	0	0	0	0	0	0	0	0	0	0	0
0	0	63	176	86	27.7634	78	1	1	0	0	0	0	0	0	1	0	0	1	0	0	0	0	0	0	0	0
0	1	41	167	64	22.9481	78	0	0	0	0	0	0	0	0	0	0	0	0	0	0	0	0	0	0	0	0
0	0	67	172	75	25.3515	80	0	0	0	1	0	1	1	0	1	1	0	0	0	0	0	0	0	0	0	0
0	1	54	159	60	23.7332	74	0	0	0	0	0	0	0	1	1	0	0	1	0	0	0	0	0	0	0	0
0	1	53	163	65	24.4646	73	0	0	0	0	0	0	0	0	0	0	0	0	0	0	0	0	1	0	0	0
0	1	48	155	55	22.8928	68	0	0	0	0	0	0	1	0	1	0	0	1	0	0	0	0	0	0	0	0
0	1	53	165	60	22.0386	64	0	0	0	0	0	1	0	0	0	0	0	0	0	0	0	0	1	0	0	0
0	1	42	160	60	23.4375	67	0	0	0	1	1	1	0	0	0	0	0	0	0	0	0	0	0	0	0	0
0	0	48	173	78	26.0617	78	0	1	0	0	0	0	1	0	1	0	0	0	0	0	0	0	0	0	0	0
0	1	54	152	50	21.6413	69	0	0	0	0	0	1	0	0	0	0	0	0	0	0	0	0	0	0	0	0
0	0	55	175	100	32.6531	78	0	1	0	0	0	1	1	0	1	0	0	1	0	0	0	0	1	0	0	0
0	1	50	160	70	27.3438	83	0	0	0	0	1	0	0	0	0	0	0	0	0	0	0	0	0	0	0	0
0	1	49	155	71	29.5525	82	0	0	0	0	0	1	0	0	0	0	1	0	0	0	0	0	1	0	0	0
0	1	51	165	65	23.8751	79	0	0	0	0	0	0	0	0	0	0	0	0	0	0	0	0	0	0	0	0
0	1	22	162	84	32.0073	79	0	1	0	0	0	0	0	0	0	0	0	0	0	0	0	0	0	0	0	0
0	1	48	170	78	26.9896	82	0	0	0	0	0	1	0	1	0	0	0	0	0	0	0	0	1	0	0	0
0	1	38	163	49	18.4425	92	0	0	0	0	0	1	0	0	0	0	0	0	0	1	1	0	0	0	0	0
0	1	60	158	60	24.0346	78	0	0	0	0	0	1	0	0	1	0	1	1	0	0	0	0	0	0	0	0
0	0	41	168	60	21.2585	78	0	1	0	1	0	1	0	1	0	0	0	1	0	1	1	1	0	0	0	0
0	0	61	165	54	19.8347	79	1	1	1	1	1	0	1	0	1	1	0	0	0	0	0	0	0	0	0	0
0	0	51	178	91	28.7211	87	1	1	0	0	0	1	0	0	1	0	0	1	0	0	0	0	0	0	0	0
0	1	78	160	70	27.3438	82	0	0	0	0	0	0	0	0	1	0	0	0	0	0	0	0	0	0	0	0
0	0	41	180	90	27.7778	78	1	1	1	0	0	0	0	0	0	0	0	1	0	0	0	0	0	0	0	0
0	1	46	165	75	27.5482	82	0	0	0	0	0	0	0	0	1	0	0	0	0	0	0	0	0	0	0	0
0	1	33	168	70	24.8016	84	0	0	0	0	0	0	0	0	0	0	0	0	0	0	0	0	0	0	0	0
0	1	42	163	65	24.4646	87	1	0	0	0	0	0	0	0	0	0	0	0	0	0	0	0	0	0	0	0
0	1	71	150	56	24.8889	72	0	0	0	0	0	0	0	0	1	0	0	0	0	0	0	0	0	0	0	0
0	0	50	165	65	23.8751	84	0	0	0	0	0	0	0	0	0	0	0	0	0	0	0	0	0	0	0	0
0	0	56	170	78	26.9896	85	0	0	0	0	0	0	0	0	0	0	0	0	0	0	0	0	1	0	0	0
0	1	56	163	68	25.5937	80	0	0	0	1	0	0	0	0	0	0	0	0	0	0	0	0	0	0	0	0
0	1	50	162	54	20.5761	79	0	0	0	0	0	1	0	0	0	0	0	0	0	0	0	0	0	0	0	0
0	0	51	177	80	25.5354	80	0	0	0	0	0	0	0	0	0	0	0	0	0	0	0	0	0	0	0	0
0	0	59	170	65	22.4913	83	1	0	1	0	0	1	0	0	0	0	0	0	0	0	0	0	0	0	0	0
0	1	29	170	53	18.3391	82	0	0	1	0	1	0	0	0	0	0	0	0	0	0	0	0	0	0	0	0
0	0	36	174	90	29.7265	84	0	0	0	0	0	0	0	0	1	0	1	1	0	0	0	0	0	0	0	0
0	0	51	170	80	27.6817	76	0	0	0	0	0	0	0	0	1	0	0	1	0	0	0	0	0	0	0	0
0	1	57	167	51	18.2868	83	0	0	0	0	0	0	0	0	0	0	0	1	0	0	0	0	1	0	0	0
0	0	35	183	105	31.3536	78	0	0	0	0	0	1	0	0	0	0	0	0	0	0	0	0	0	0	0	0
0	0	54	165	60	22.0386	78	0	0	1	0	0	1	1	0	1	0	0	0	0	1	1	0	0	0	0	0
0	0	45	175	80	26.1224	76	1	0	0	0	0	0	0	0	1	0	0	0	0	0	0	0	0	0	0	0
0	1	51	165	77	28.2828	76	0	0	0	0	0	0	0	0	1	0	0	0	0	0	0	0	1	0	0	0
0	0	64	170	85	29.4118	81	0	1	1	0	1	1	0	0	0	0	0	0	0	0	0	1	0	0	0	0
0	1	49	155	71	29.5525	80	0	0	0	0	0	1	0	0	0	0	1	0	0	0	1	0	1	0	0	0
0	1	50	160	70	27.3438	78	0	0	0	0	0	0	0	0	0	0	0	0	0	1	1	0	0	0	0	0
0	0	55	175	100	32.6531	75	0	0	0	0	0	0	1	0	1	0	0	1	0	0	0	0	1	0	0	0
0	1	50	152	50	21.6413	79	0	0	0	0	0	0	0	0	0	0	0	0	0	0	0	0	0	0	0	0
0	0	48	173	78	26.0617	80	0	1	1	0	0	0	1	0	0	0	0	0	0	0	0	0	0	0	0	0
0	1	42	160	60	23.4375	77	0	0	0	1	1	0	0	0	0	0	0	0	0	0	0	0	0	0	0	0
0	1	53	165	60	22.0386	75	0	0	0	0	0	0	0	0	0	0	0	0	0	0	1	0	0	0	0	0
0	1	48	155	55	22.8928	90	0	0	0	0	0	1	1	0	0	1	0	1	0	0	0	0	1	0	0	0
0	1	63	165	60	22.0386	80	0	0	0	0	0	1	1	0	1	0	0	0	0	1	1	0	0	0	0	0
0	1	51	165	70	25.7117	82	0	0	0	1	0	0	0	0	0	0	0	0	0	0	0	0	1	0	0	0
0	1	48	170	78	26.9896	84	0	0	0	0	0	1	0	1	0	0	0	0	0	0	0	0	0	0	0	0
0	1	45	163	65	24.4646	70	0	0	0	0	0	1	0	0	0	0	0	0	0	0	0	0	0	0	0	0
0	1	60	160	72	28.125	79	0	0	0	0	0	0	0	0	0	0	0	0	0	0	0	0	0	0	0	0
0	1	63	165	55	20.202	80	0	0	0	0	0	0	0	0	0	1	0	0	0	0	0	0	0	0	0	0
0	1	62	155	62	25.8065	70	0	0	0	0	0	0	0	0	0	1	0	1	0	0	0	0	0	0	0	0
0	1	59	158	66	26.4381	78	0	0	0	0	0	0	0	0	0	0	0	0	0	0	0	0	0	0	0	0
0	0	67	178	69	21.7776	81	0	0	0	0	0	0	0	0	1	0	0	0	0	1	1	0	0	0	0	0
0	0	59	175	73	23.8367	86	0	1	0	0	0	0	1	0	1	0	0	1	0	0	1	0	0	0	0	0
0	0	65	170	69	23.8754	82	0	0	0	0	0	0	0	0	1	1	1	0	0	1	1	1	0	0	0	0
0	1	67	174	101	33.3598	80	0	0	0	0	0	0	0	0	0	0	0	0	0	0	0	0	0	0	0	0
0	0	48	178	70	22.0932	74	0	0	0	0	0	0	0	0	0	0	0	0	0	0	0	0	0	0	0	0
0	0	52	170	80	27.6817	78	0	0	0	0	0	0	0	0	0	0	0	0	0	0	1	0	0	0	0	0
0	0	33	175	62.5	20.4082	75	0	0	0	0	0	0	0	0	0	0	0	0	0	0	0	0	0	0	0	0
0	1	50	165	67	24.6097	79	0	0	0	0	0	0	0	0	0	0	0	0	0	0	0	0	0	0	0	0
0	0	58	175	65	21.2245	80	0	0	0	0	0	0	0	0	0	0	0	0	0	0	0	0	0	0	0	0
0	1	60	165	85	31.2213	77	0	0	0	0	0	0	0	0	0	0	0	0	0	0	0	0	0	0	0	0
0	1	63	160	60	23.4375	74	0	0	0	0	0	0	0	0	0	0	0	0	0	0	0	0	0	0	0	0
0	0	67	178	70	22.0932	79	0	0	1	0	0	0	0	0	1	0	0	0	0	1	1	0	0	0	0	0
0	1	64	158	69	27.6398	80	0	0	0	0	0	0	0	0	0	0	0	0	0	0	0	0	0	0	0	0
0	1	62	167	70	25.0995	70	0	0	0	0	0	0	0	0	0	0	0	0	0	0	0	0	0	0	0	0
0	1	49	162	68	25.9107	78	0	0	0	0	0	0	0	0	0	0	0	0	0	0	0	0	0	0	0	0
0	0	46	175	87	28.4082	81	0	0	1	0	0	0	0	0	0	0	0	0	0	0	0	0	0	0	0	0
0	0	62	170	70	24.2215	87	0	0	0	0	0	0	0	0	0	0	0	0	0	0	0	0	0	0	0	0
0	0	39	182	70	21.1327	81	0	0	0	0	0	0	0	0	0	0	0	0	0	0	0	0	0	0	0	0
0	1	46	162	53	20.1951	80	0	0	1	0	0	0	0	0	0	0	0	0	0	0	0	0	0	0	0	0
0	1	78	164	60	22.3081	73	0	0	0	0	0	0	0	0	0	0	0	0	0	0	0	0	0	0	0	0
0	1	66	171	63	21.5451	80	0	0	0	0	0	0	0	0	0	0	0	0	0	0	0	0	0	0	0	0
0	1	64	165	66	24.2424	78	0	0	0	0	0	0	0	0	0	0	0	0	0	0	0	0	0	0	0	0
0	1	37	164	60	22.3081	75	0	0	0	0	0	0	0	0	0	0	0	0	0	0	1	0	0	0	0	0
0	1	53	157	55	22.3133	79	0	0	0	0	0	0	0	0	0	0	0	0	0	0	0	0	0	0	0	0
0	1	40	160	52	20.3125	80	0	0	1	0	0	0	0	0	1	0	0	0	0	1	0	0	0	0	0	0
0	1	37	160	50	19.5312	77	0	0	0	0	0	0	0	0	1	0	0	0	0	0	0	0	0	0	0	0
0	0	32	167	65	23.3067	75	0	0	0	0	0	0	0	0	0	0	0	0	0	0	0	0	0	0	0	0
0	0	69	180	80	24.6914	90	0	0	0	0	0	0	0	0	0	0	0	0	0	0	0	0	0	0	0	0
0	0	67	170	70	24.2215	80	0	0	0	0	0	0	0	0	0	0	0	0	0	0	0	0	0	0	0	0
0	0	70	165	55	20.202	82	0	0	0	0	0	0	0	0	1	0	0	0	0	0	0	0	0	0	0	0
0	1	70	160	59	23.0469	84	0	0	0	0	0	0	0	0	0	1	0	0	0	0	0	0	0	0	0	0
0	1	64	156	47	19.313	70	0	0	0	0	0	1	0	0	1	1	0	0	0	0	0	0	0	0	0	0
0	1	50	160	45	17.5781	79	0	0	0	0	0	0	0	0	1	1	0	0	0	0	0	0	0	0	0	0
0	1	53	165	64	23.5078	80	0	0	0	0	0	0	0	0	0	0	0	0	0	0	0	0	0	0	0	0
0	1	66	158	50.5	20.2291	70	0	0	0	0	0	0	0	0	0	0	0	0	0	0	0	0	0	0	0	0
0	1	60	156	51	20.9566	78	0	0	0	0	0	0	0	0	0	0	0	0	0	0	0	0	0	0	0	0
0	0	51	175	66	21.551	81	1	0	0	0	0	1	0	0	1	0	0	0	0	0	0	0	0	0	0	0
0	1	73	167	89	31.9122	86	0	0	0	0	0	0	0	0	1	0	1	0	0	0	0	0	0	0	0	0
0	1	57	160	63	24.6094	82	0	1	0	0	1	0	0	1	1	0	0	0	0	0	0	0	0	0	0	0
0	0	36	179	70	21.847	80	0	1	0	0	1	0	1	0	1	0	0	0	0	0	0	0	0	0	0	0
0	0	33	164	64	23.7954	74	0	1	1	0	1	0	0	0	0	0	0	0	0	0	0	0	0	0	0	0
0	1	61	155	48	19.9792	78	0	1	0	0	1	0	0	0	0	1	0	0	0	0	0	0	0	0	0	0
0	1	53	167	60	21.5139	75	0	1	1	0	1	0	0	0	0	0	0	0	0	0	0	0	0	0	0	0
0	1	56	156	60	24.6548	79	0	1	0	0	1	0	1	1	1	0	0	0	0	0	0	0	0	0	0	0
0	1	56	158	70	28.0404	80	0	1	0	0	1	0	1	0	1	0	0	0	0	0	0	0	0	0	0	0
0	0	61	157	57	23.1247	77	0	1	1	0	1	0	0	0	1	0	1	0	0	0	0	0	0	0	0	0
0	0	71	172	60	20.2812	74	0	1	0	0	1	0	1	0	1	0	0	0	0	0	0	0	0	0	0	0
0	1	27	160	60	23.4375	90	0	1	0	0	0	0	0	0	0	0	0	0	0	0	0	0	0	0	0	0
0	1	42	160	76	29.6875	80	0	1	0	0	0	1	0	0	1	0	0	0	0	0	0	0	0	1	0	0
0	0	62	175	75	24.4898	82	0	0	1	0	1	0	0	0	1	0	0	0	0	0	0	0	0	0	0	0
0	1	51	163	59	22.2063	84	0	1	0	0	0	1	0	1	0	1	0	0	0	0	0	0	0	0	0	0
0	1	45	150	52	23.1111	70	0	1	0	0	1	1	0	0	0	0	0	0	0	0	0	0	0	0	0	0
0	0	57	165	68	24.977	79	0	1	0	0	1	1	0	0	0	0	0	0	0	0	0	0	0	0	0	0
0	0	56	165	57	20.9366	80	1	1	0	0	0	1	0	0	0	0	0	0	0	0	0	0	0	0	0	0
0	1	71	178	60	18.937	70	0	1	0	0	1	0	0	1	0	0	0	0	0	0	0	0	0	0	0	0
0	1	33	165	57	20.9366	68	0	0	0	1	1	0	0	0	0	0	0	0	1	0	0	0	1	0	0	0
0	1	37	165	60	22.0386	68	0	0	0	0	0	0	0	0	0	0	0	0	1	0	0	0	1	0	0	0
0	0	63	168	61	21.6128	72	0	1	0	0	0	1	0	0	1	0	0	1	0	0	0	0	0	0	0	0
0	0	70	178	84	26.5118	62	0	0	1	0	0	0	0	0	0	0	0	0	0	0	0	0	0	0	0	0
0	0	56	160	57	22.2656	67	0	1	0	0	0	1	1	0	1	0	0	1	0	0	0	0	0	0	0	0
